# Supplementary material for: Brewing Quality of Hop Varieties Cultivated in Central Italy Based on Multivolatile Fingerprinting and Bitter Acid Content
Source: PubMed Central journal article supplement (PMC7278677; doi:10.3390/foods9050541), 2020-04-29

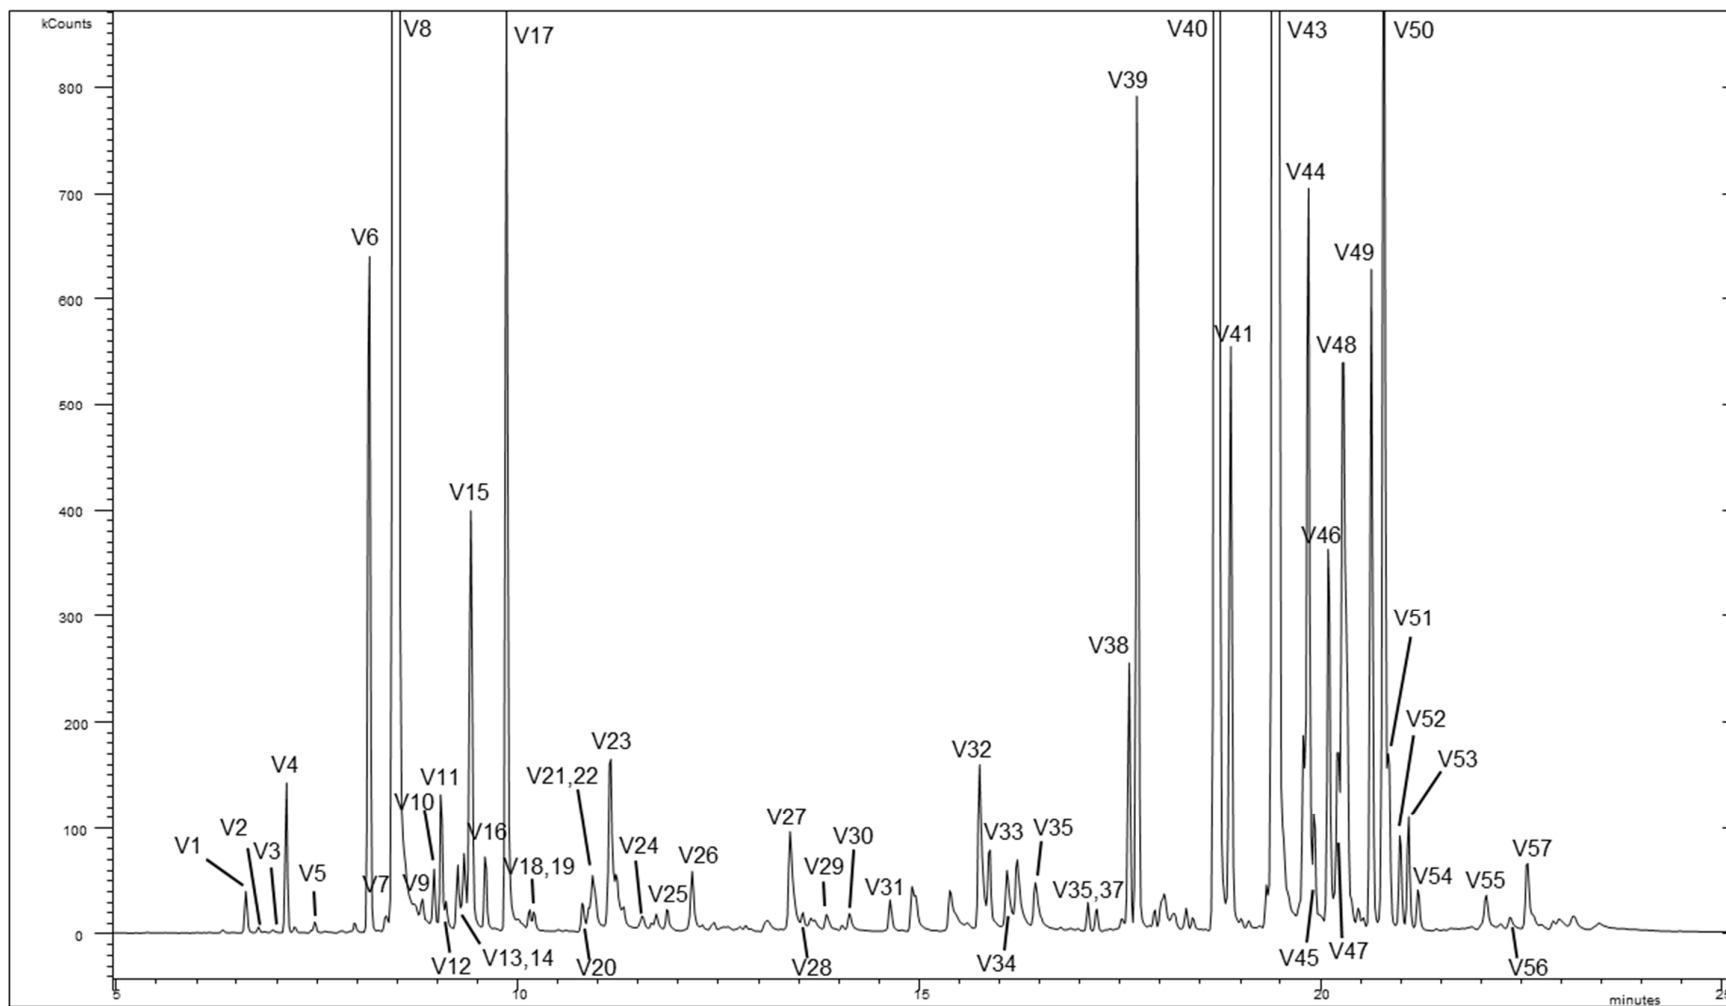

**Figure S1.** Headspace SPME-GC-MS profile (TIC, total ion current) of the Northern Brewer cultivar. Peak identification as in Table 3.

**Figure S2.** Comparison among the headspace SPME-GC-MS profiles (TIC, total ion current) of fifteen hop varieties cultivated in the Marche region, Italy. Peak V8 ( $\beta$ -myrcene) was chosen as reference (100% of full scale). Peak identification as in Table 3. (a) Hallertau; (b) Willamette; (c) Yeoman; (d) Centennial; (e) Fuggle; (f) Mount Hood; (g) Northern Brewer; (h) Galena; (i) Brewer's Gold; (j) Sterling; (k) Cascade; (l) Nugget; (m) Columbus; (n) Northdown; (o) Chinook.

S2 (a)

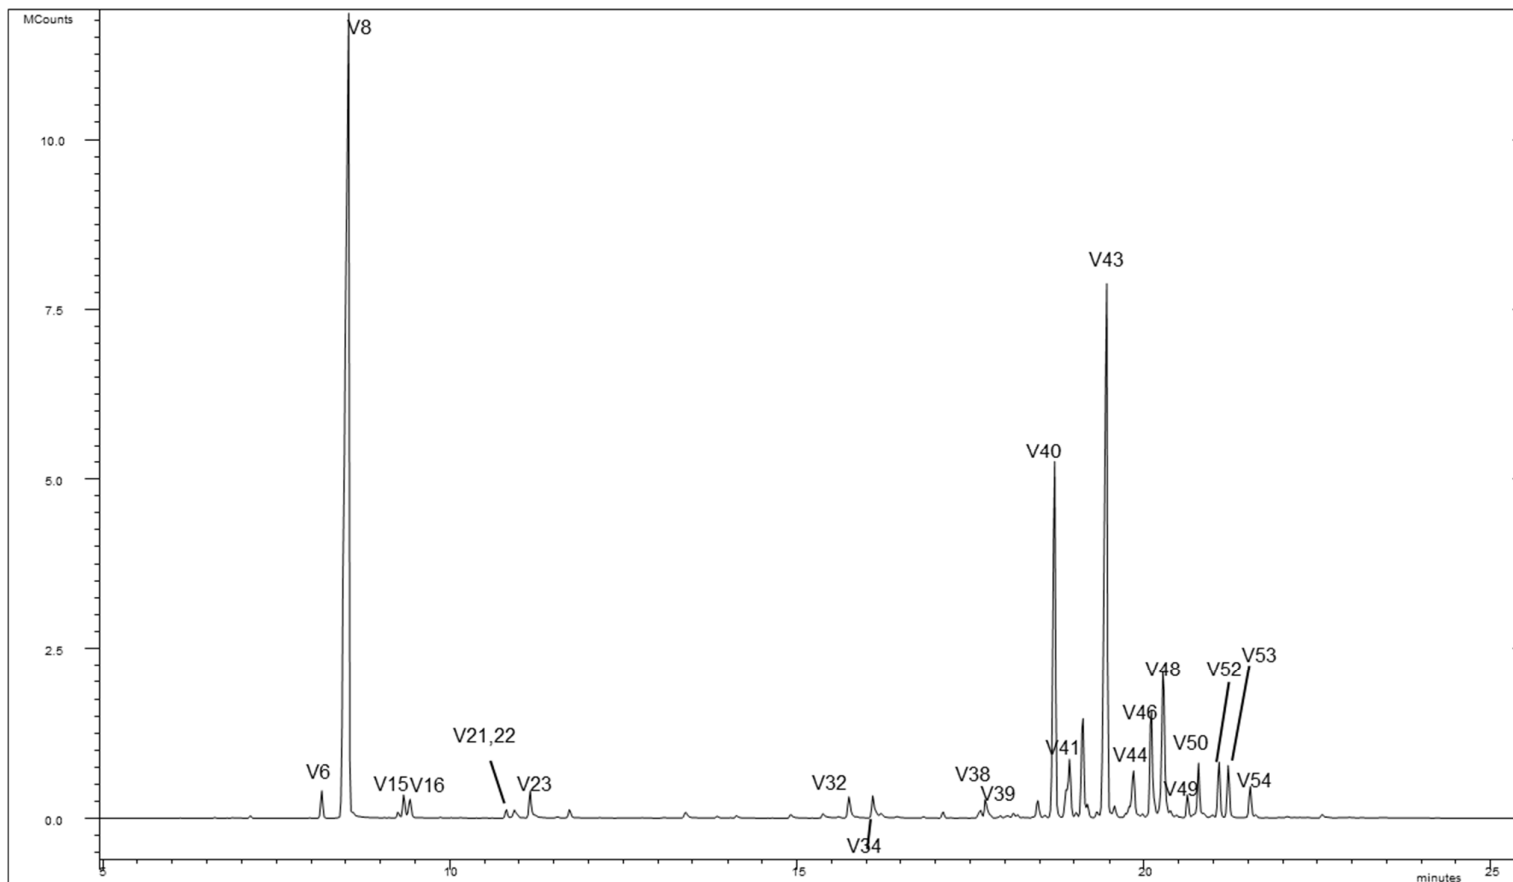

S2 (b)

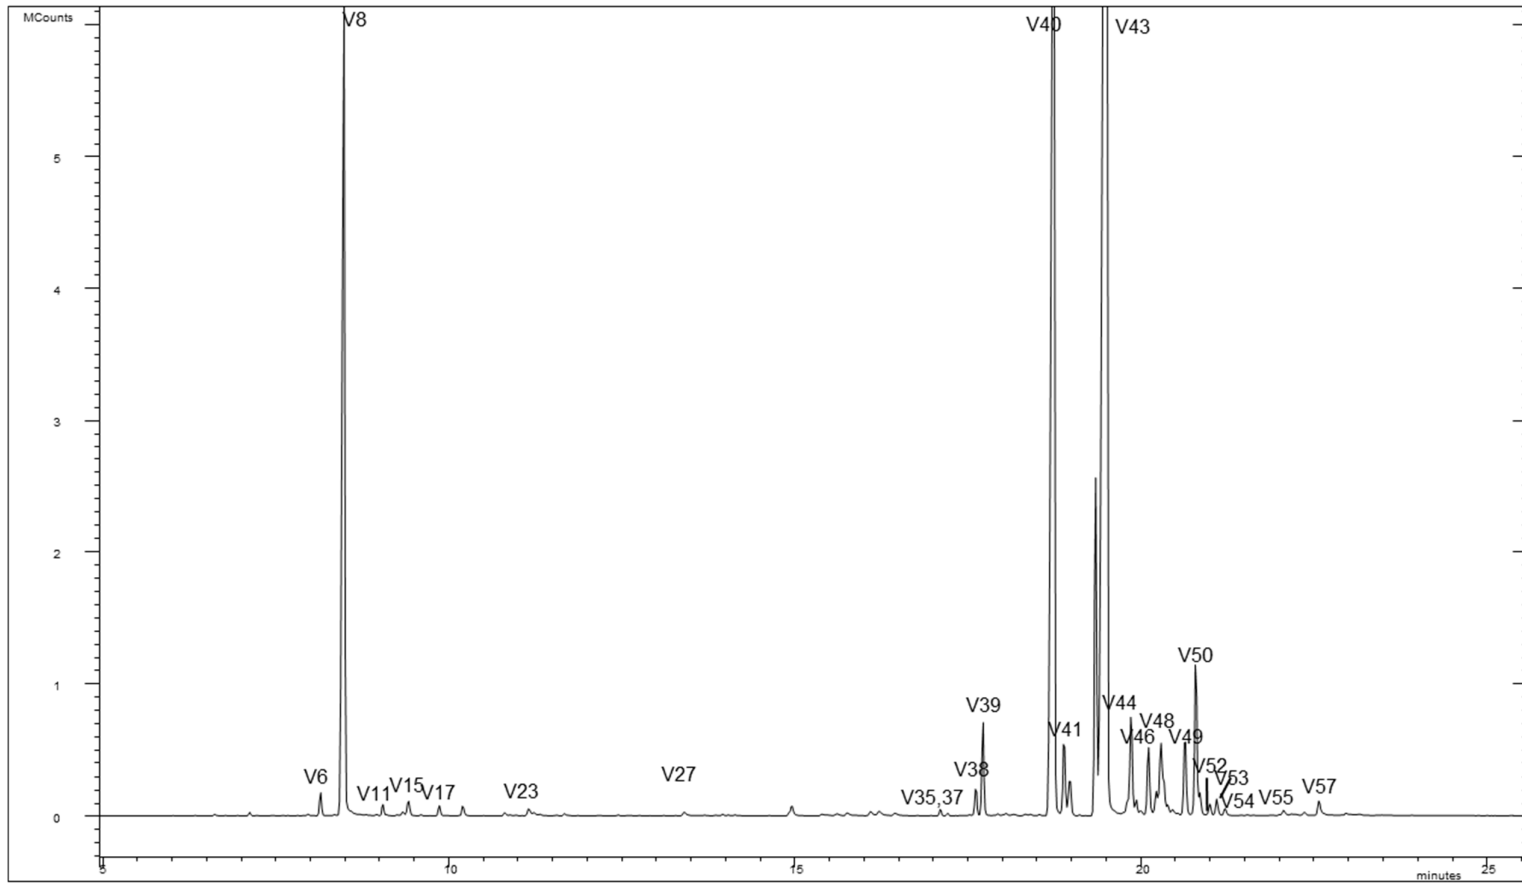

S2 (c)

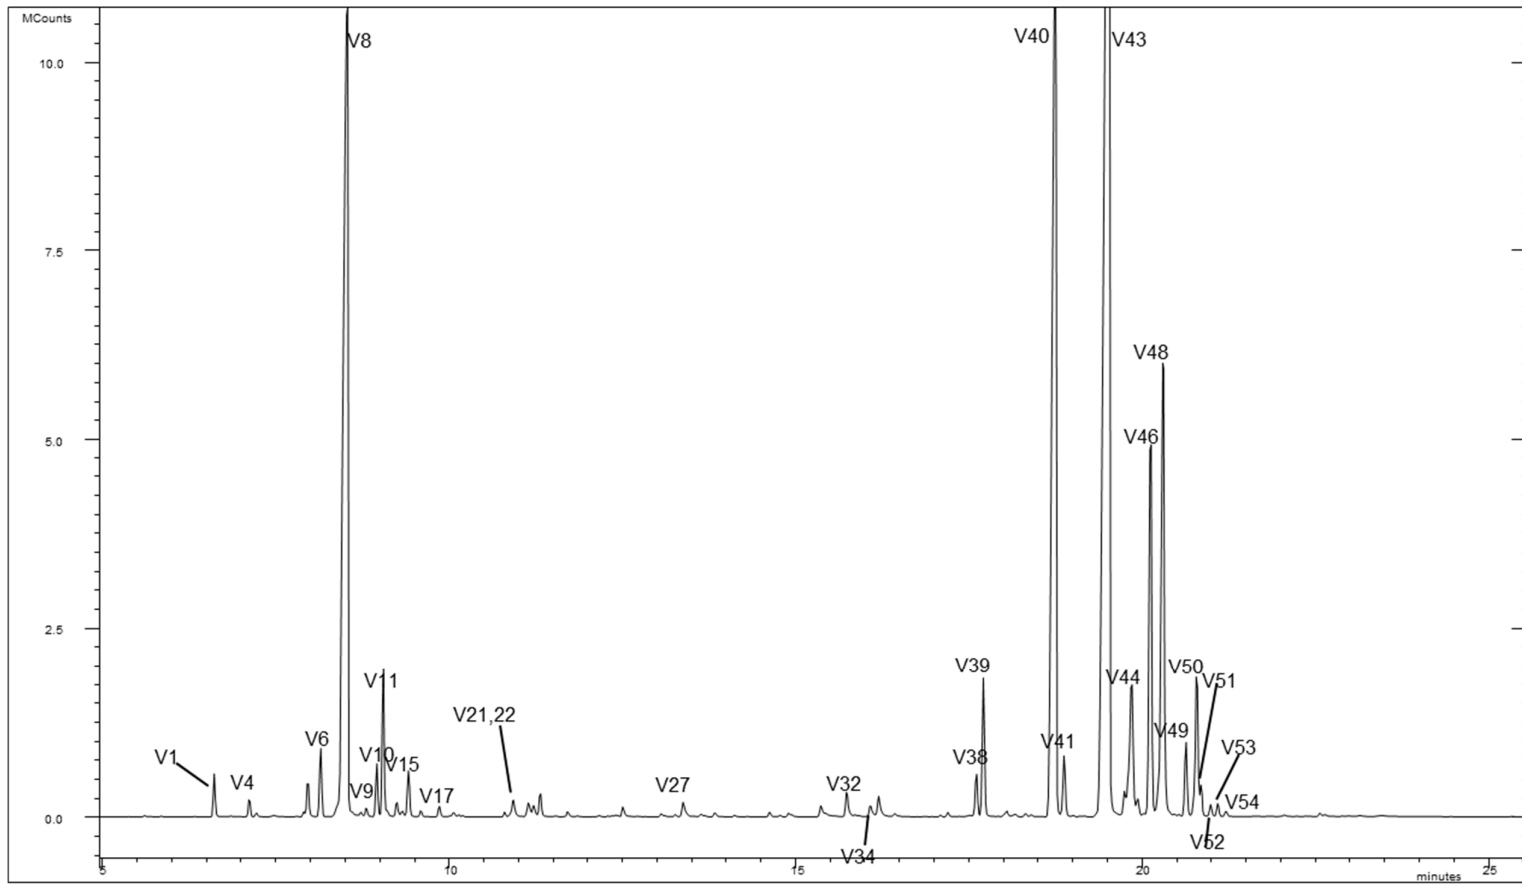

S2 (d)

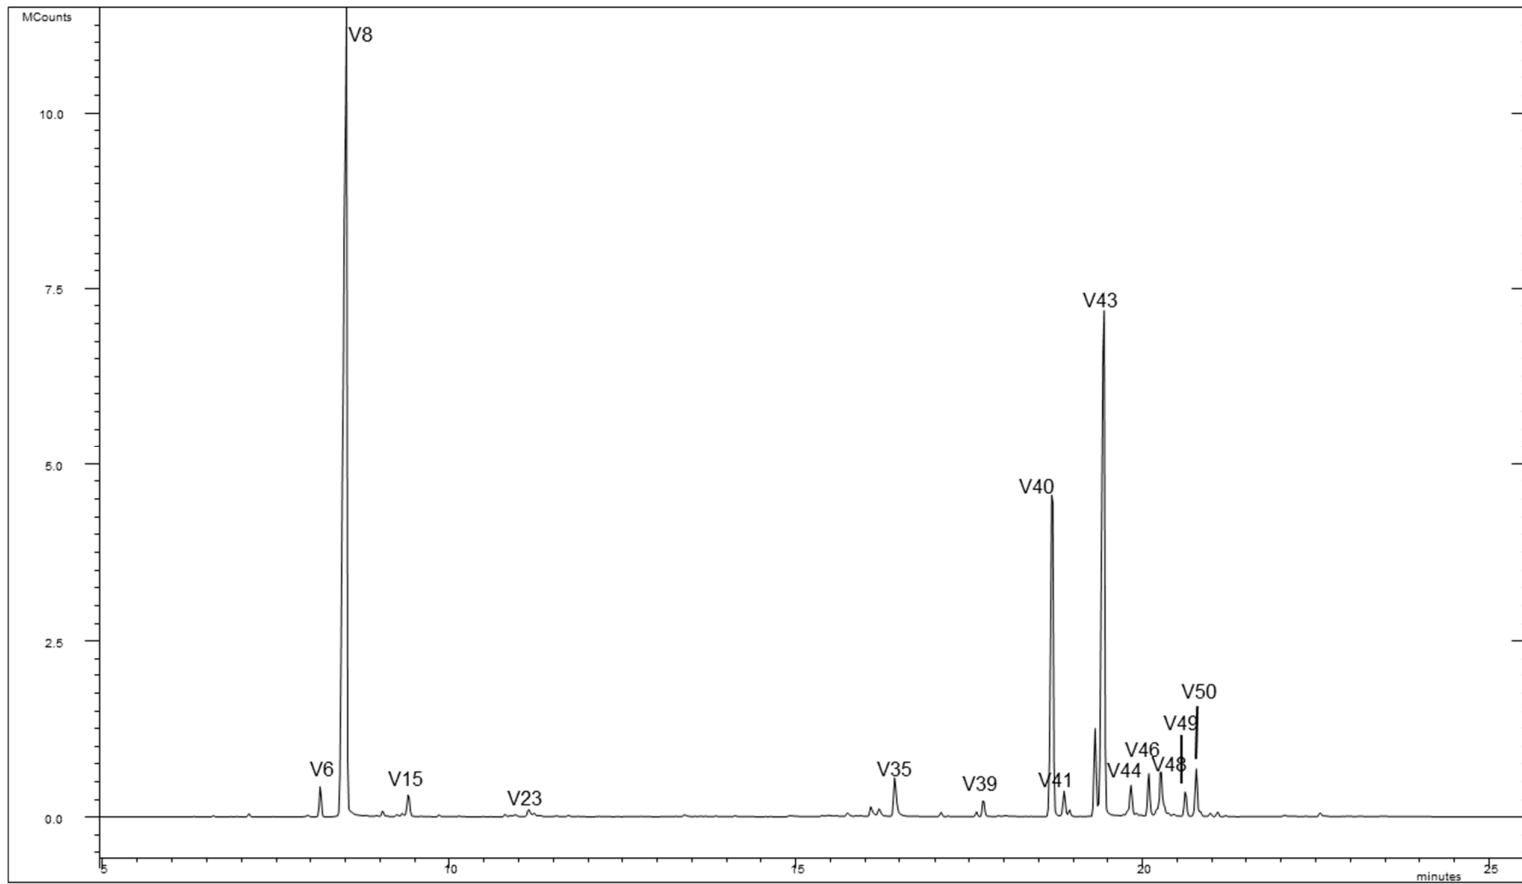

S2 (e)

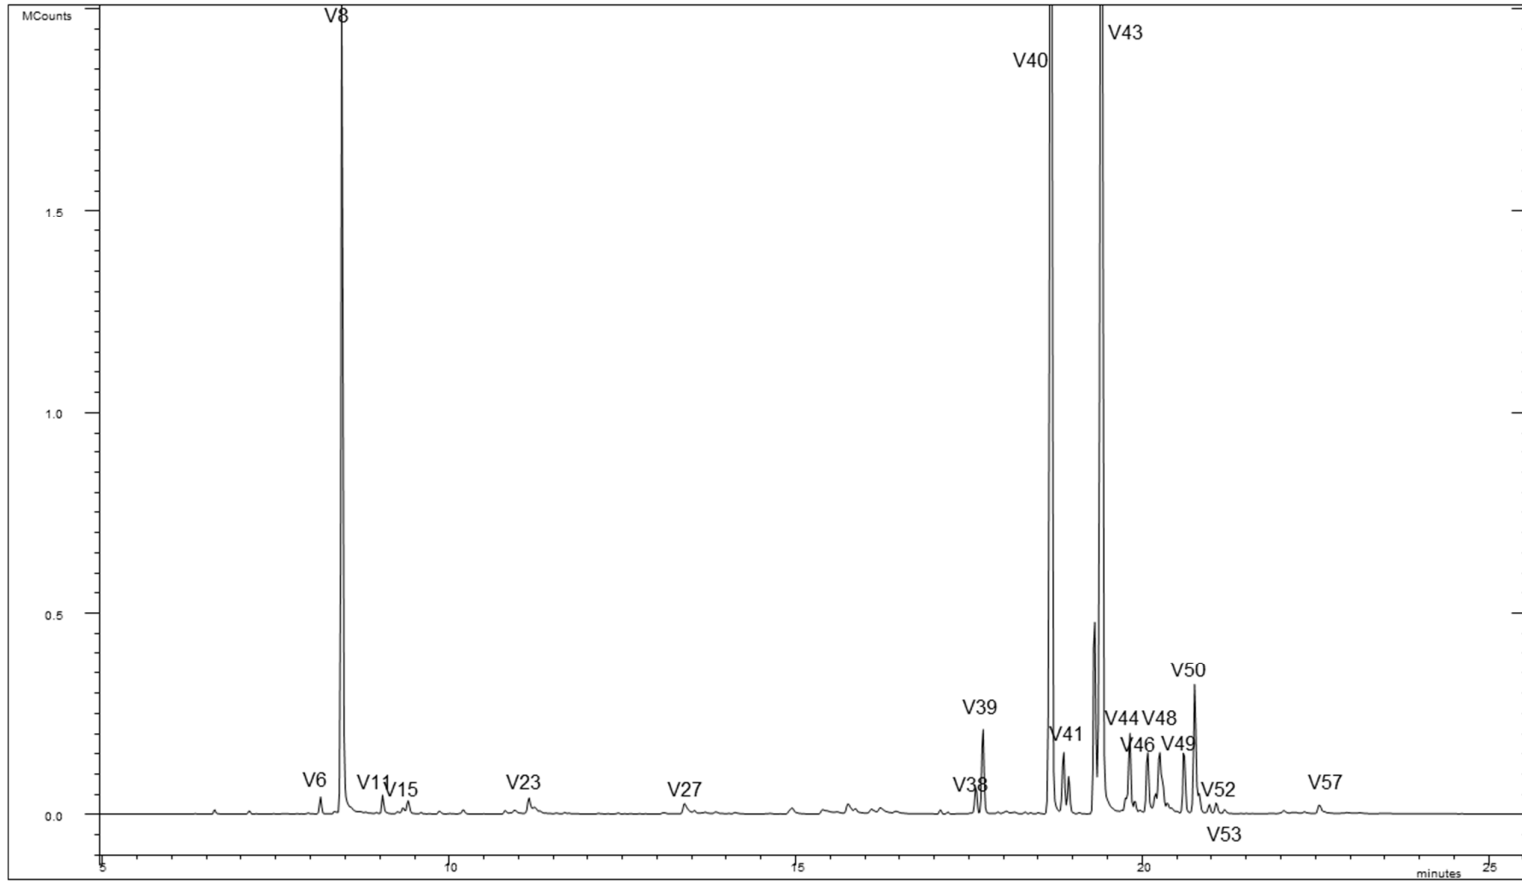

S2 (f)

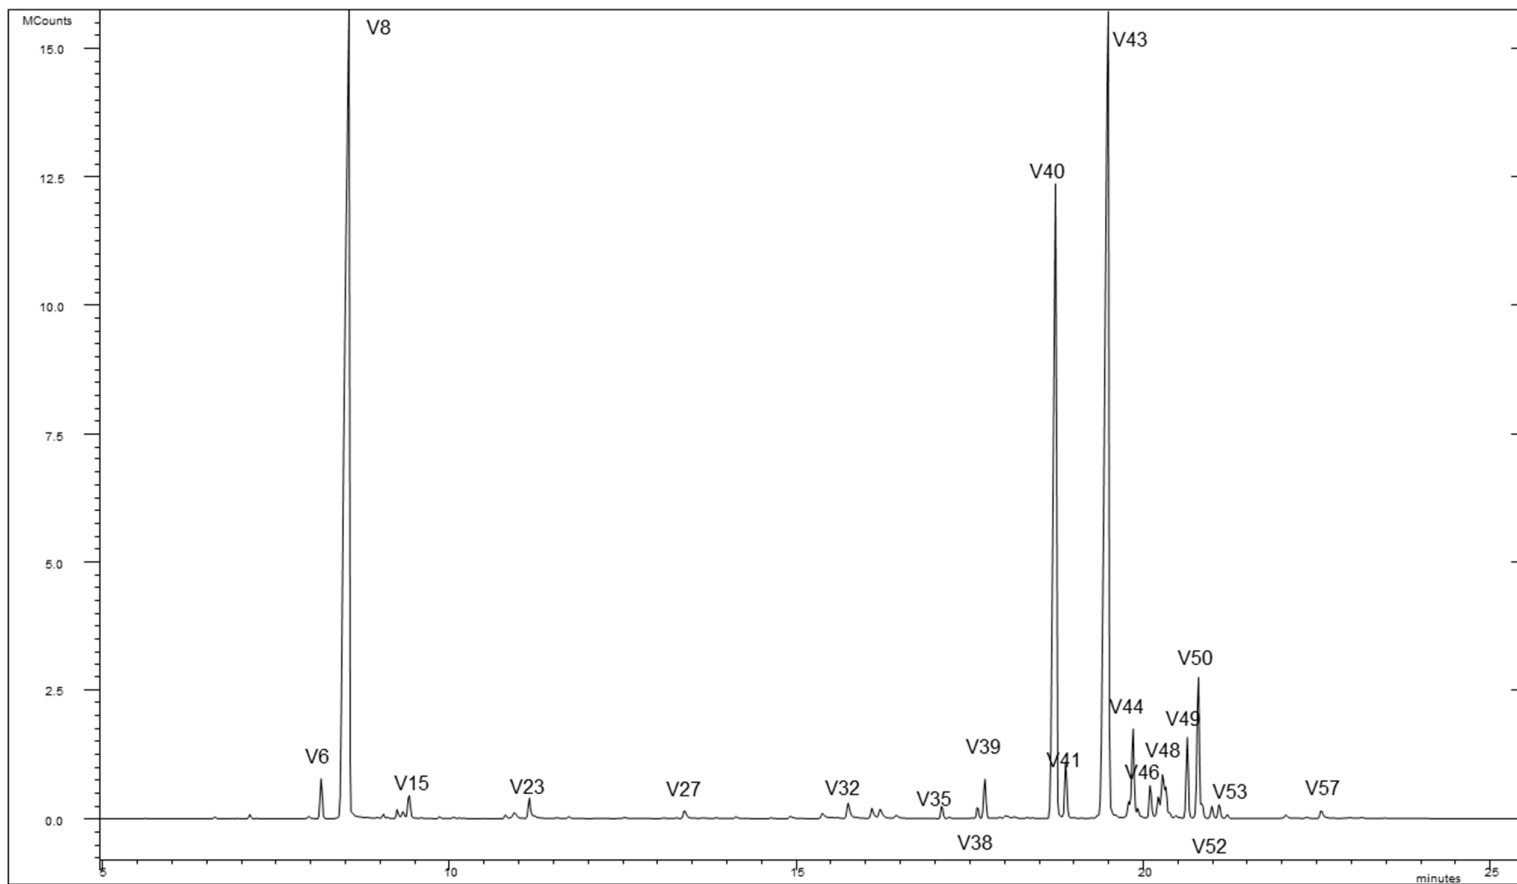

S2 (g)

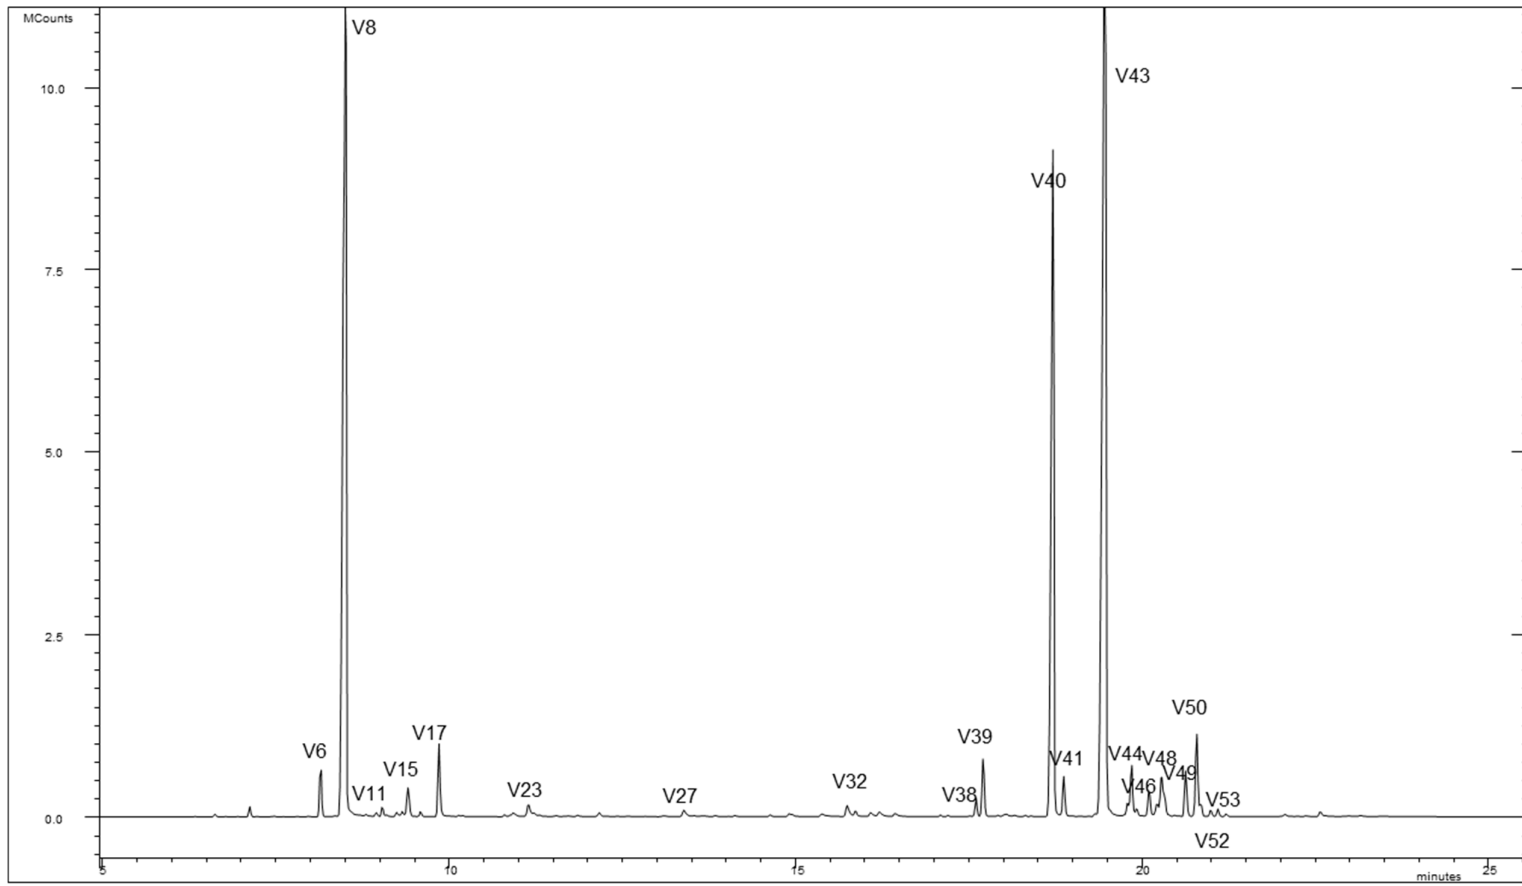



S2 (h)

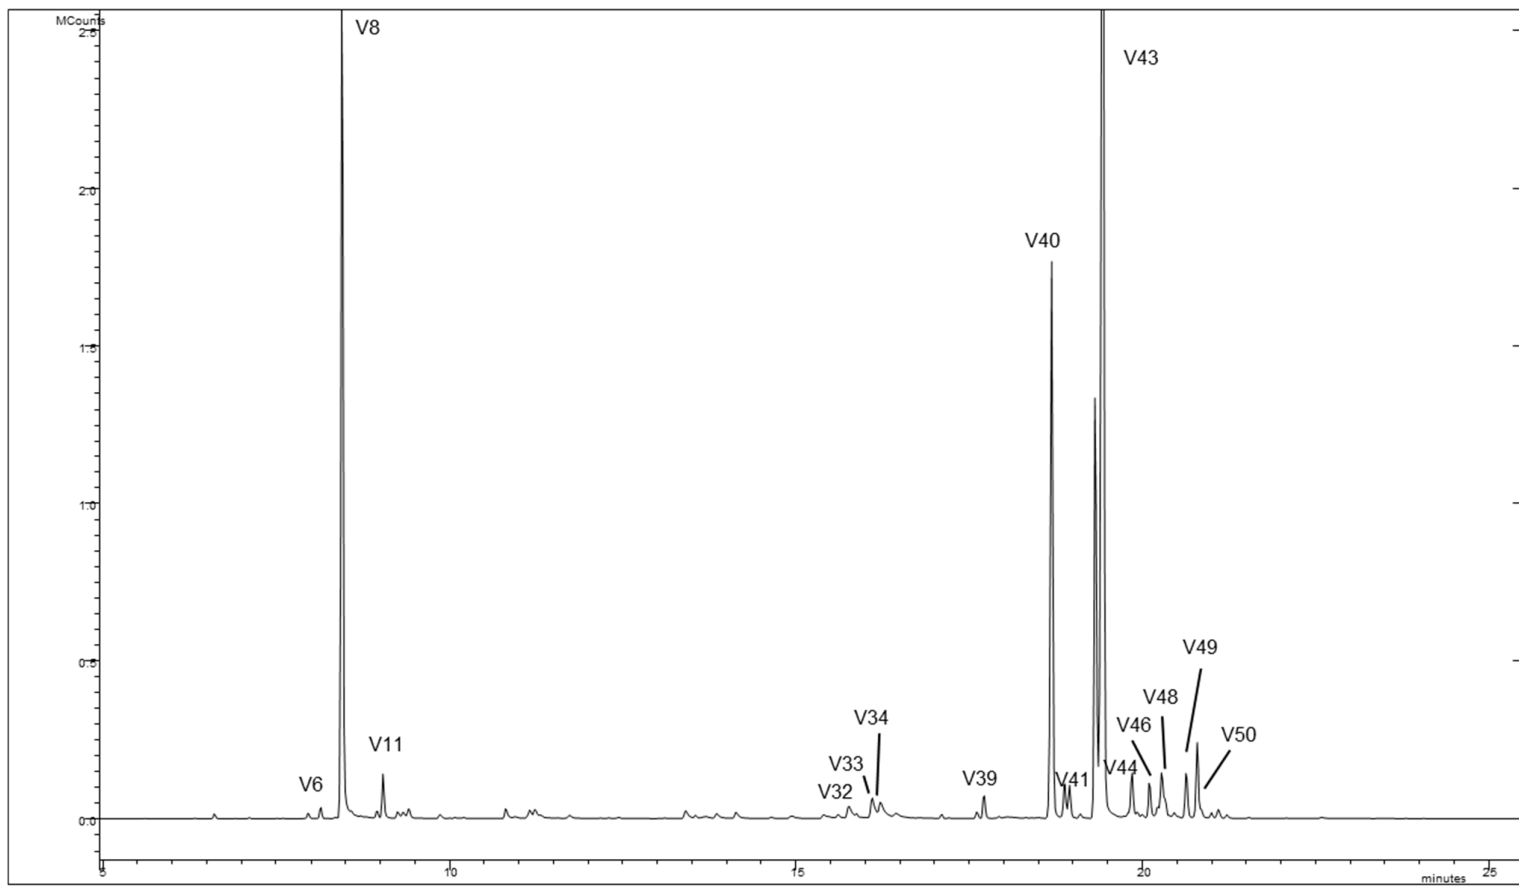

S2 (i)

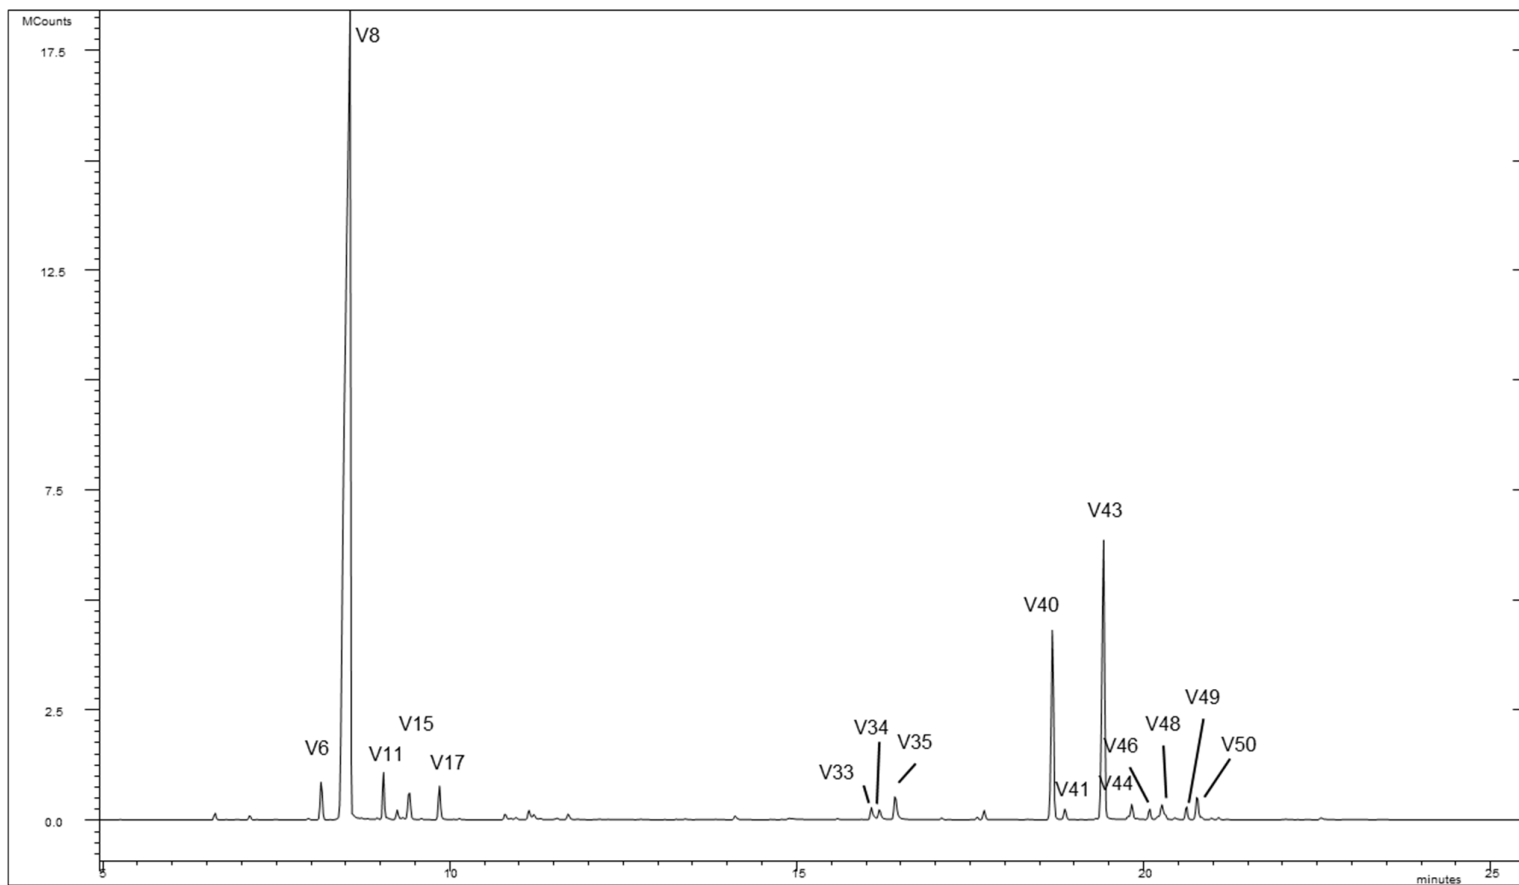

S2 (j)

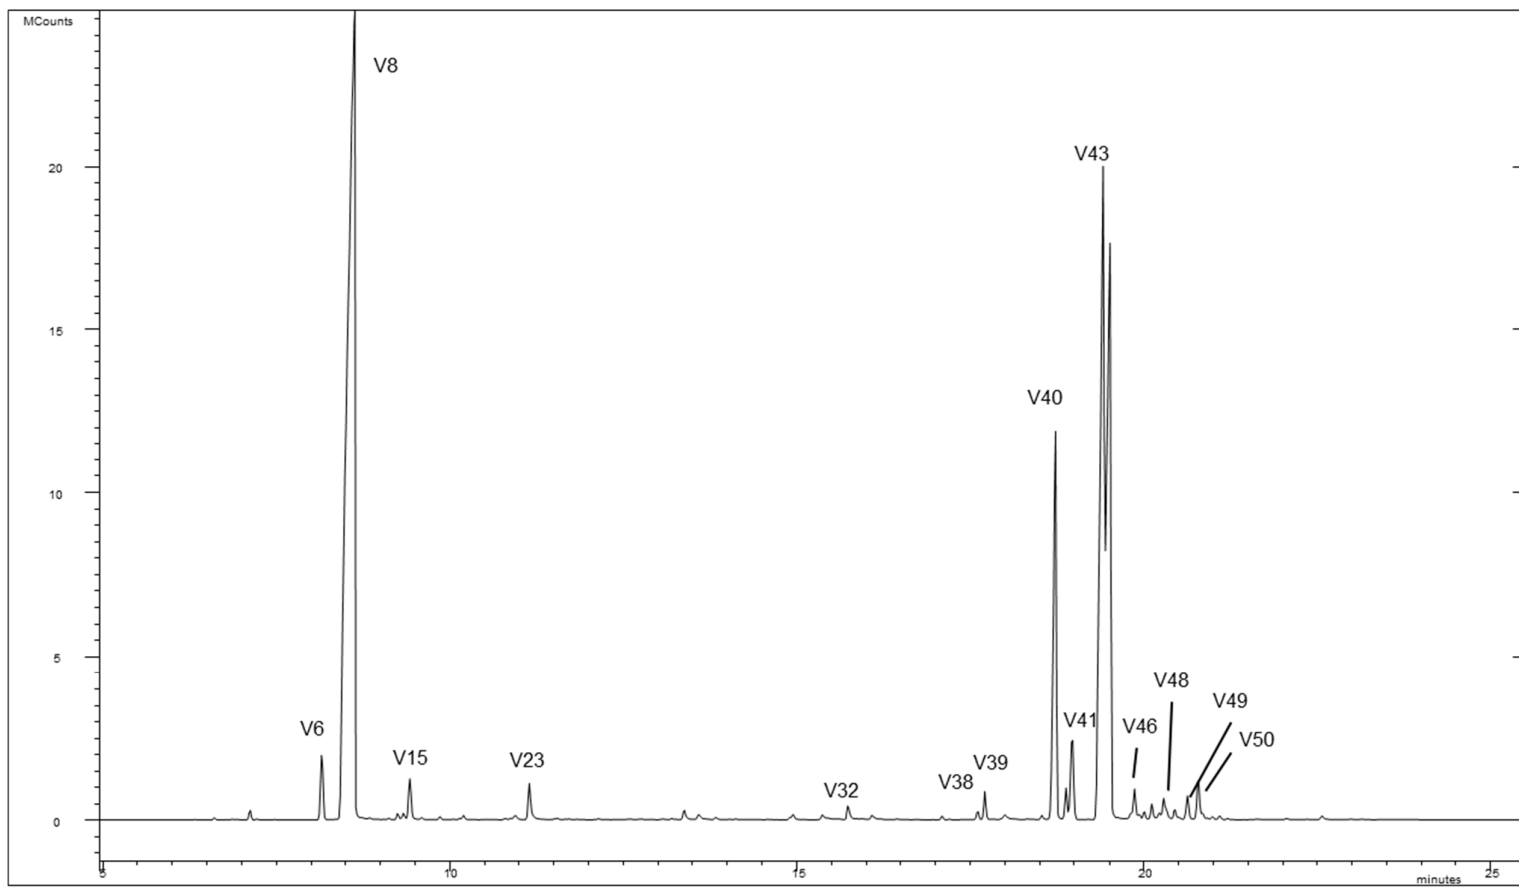

S2 (k)

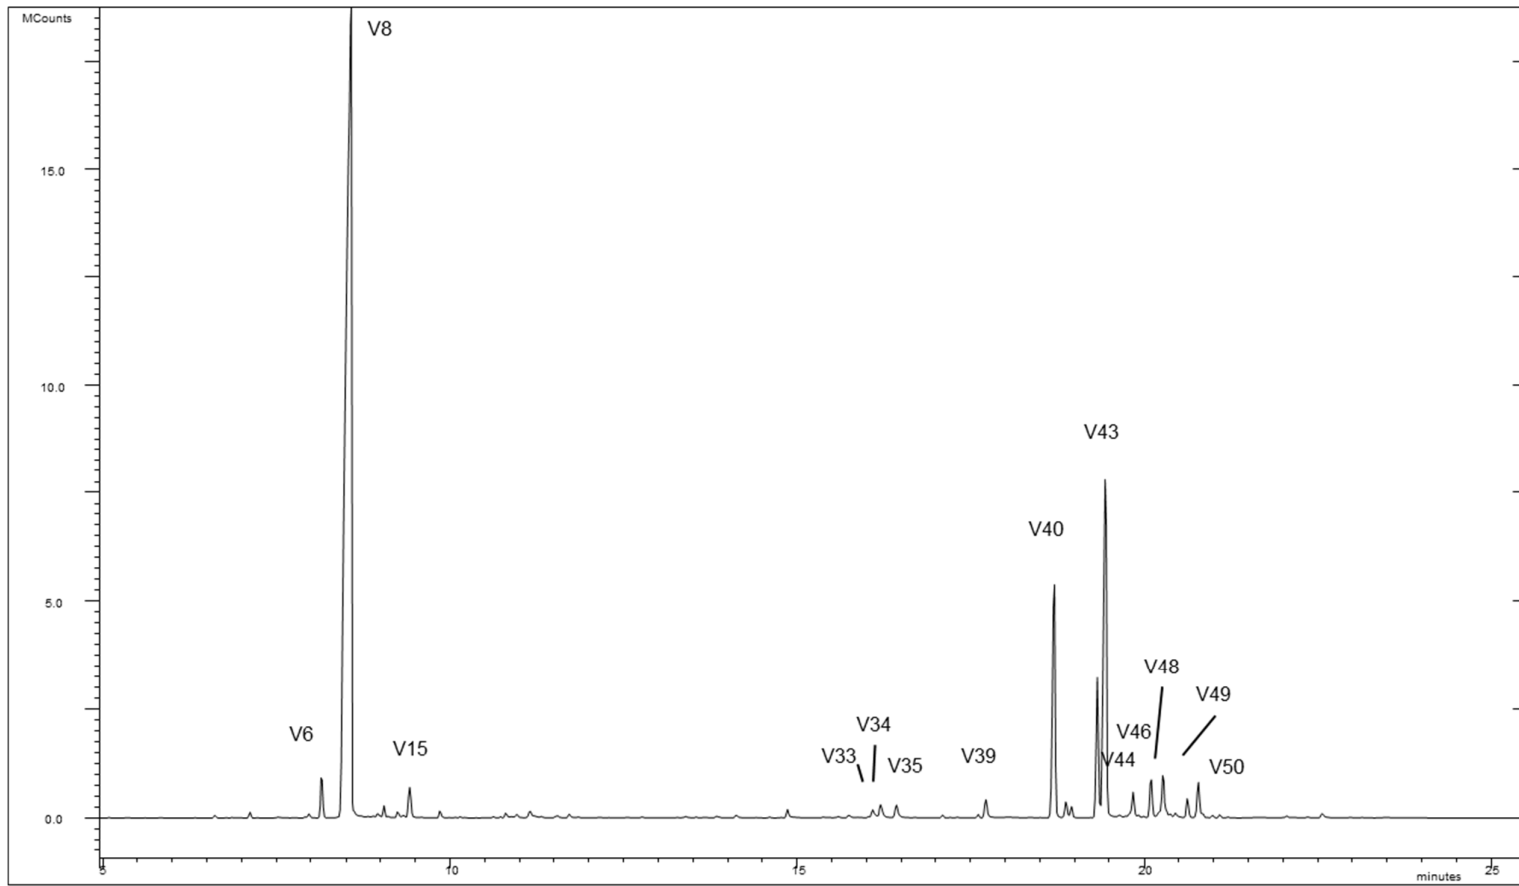

S2 (l)

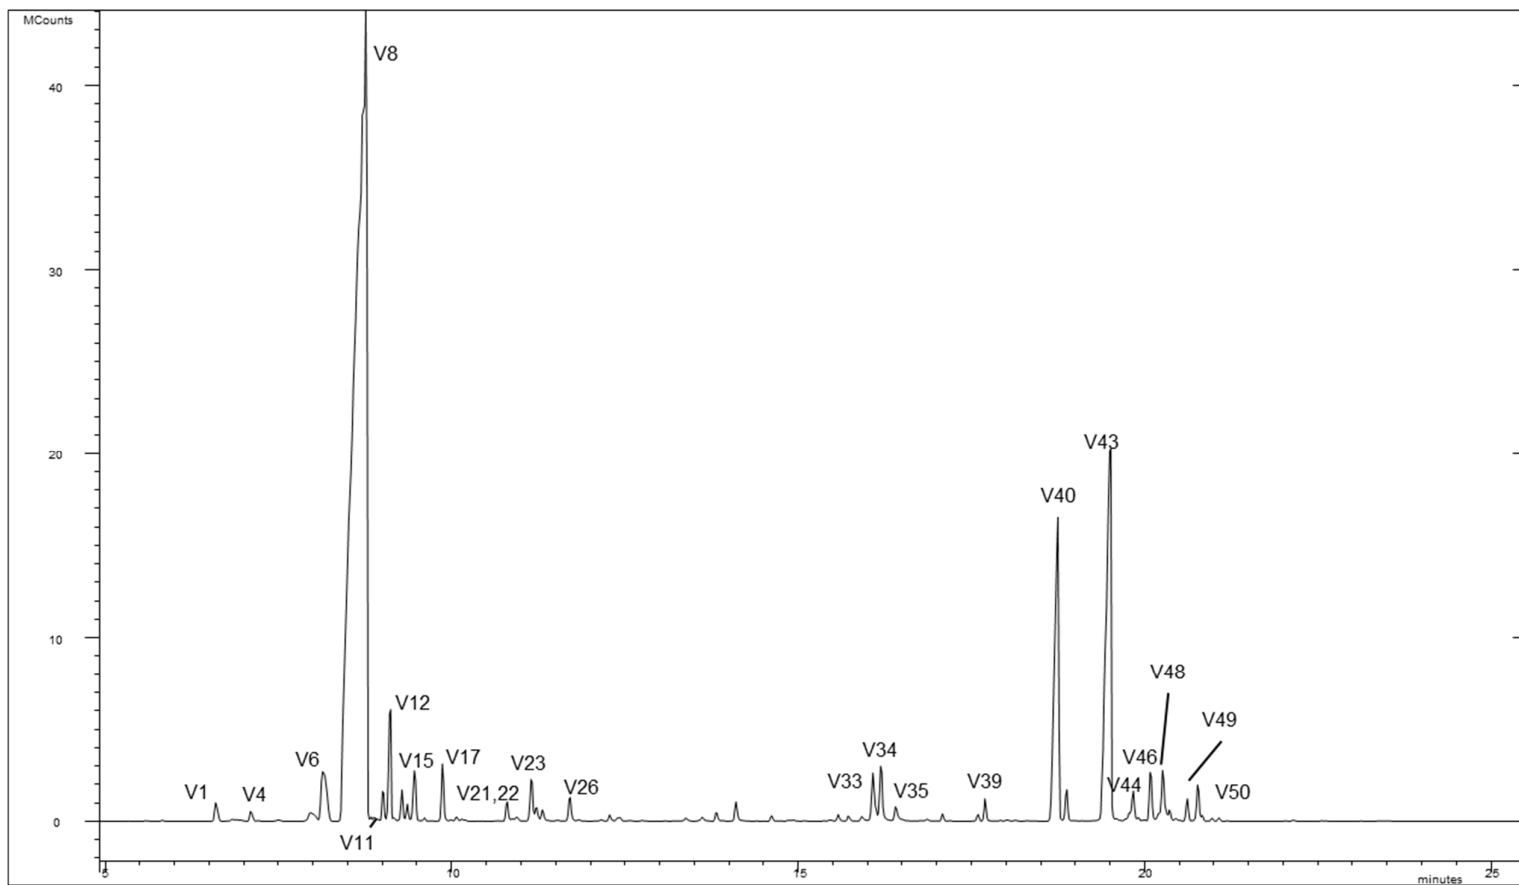

S2 (m)

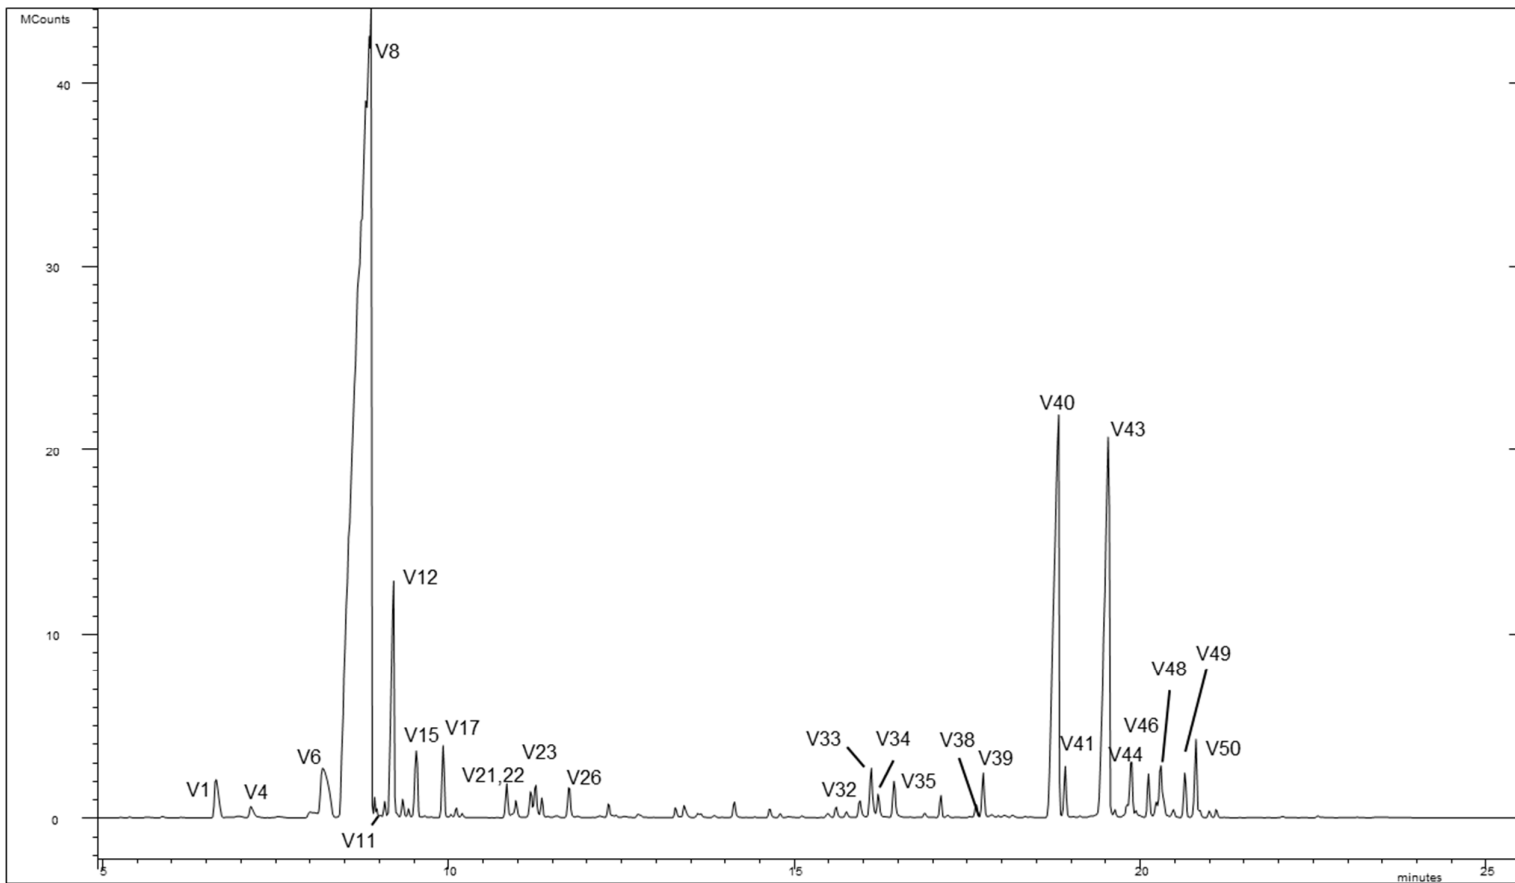

S2 (n)

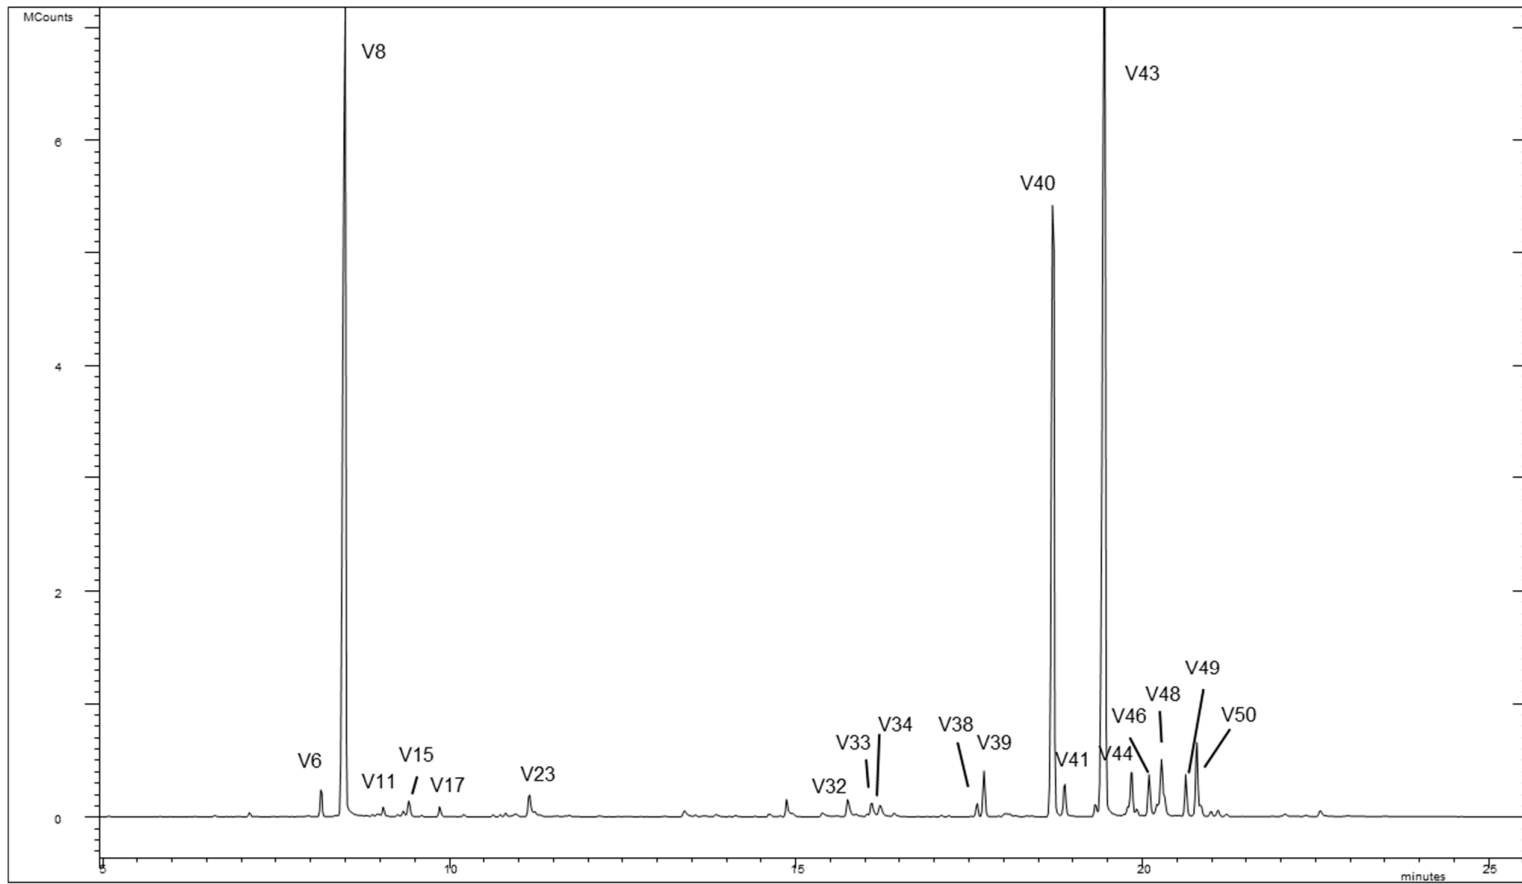

S2 (o)

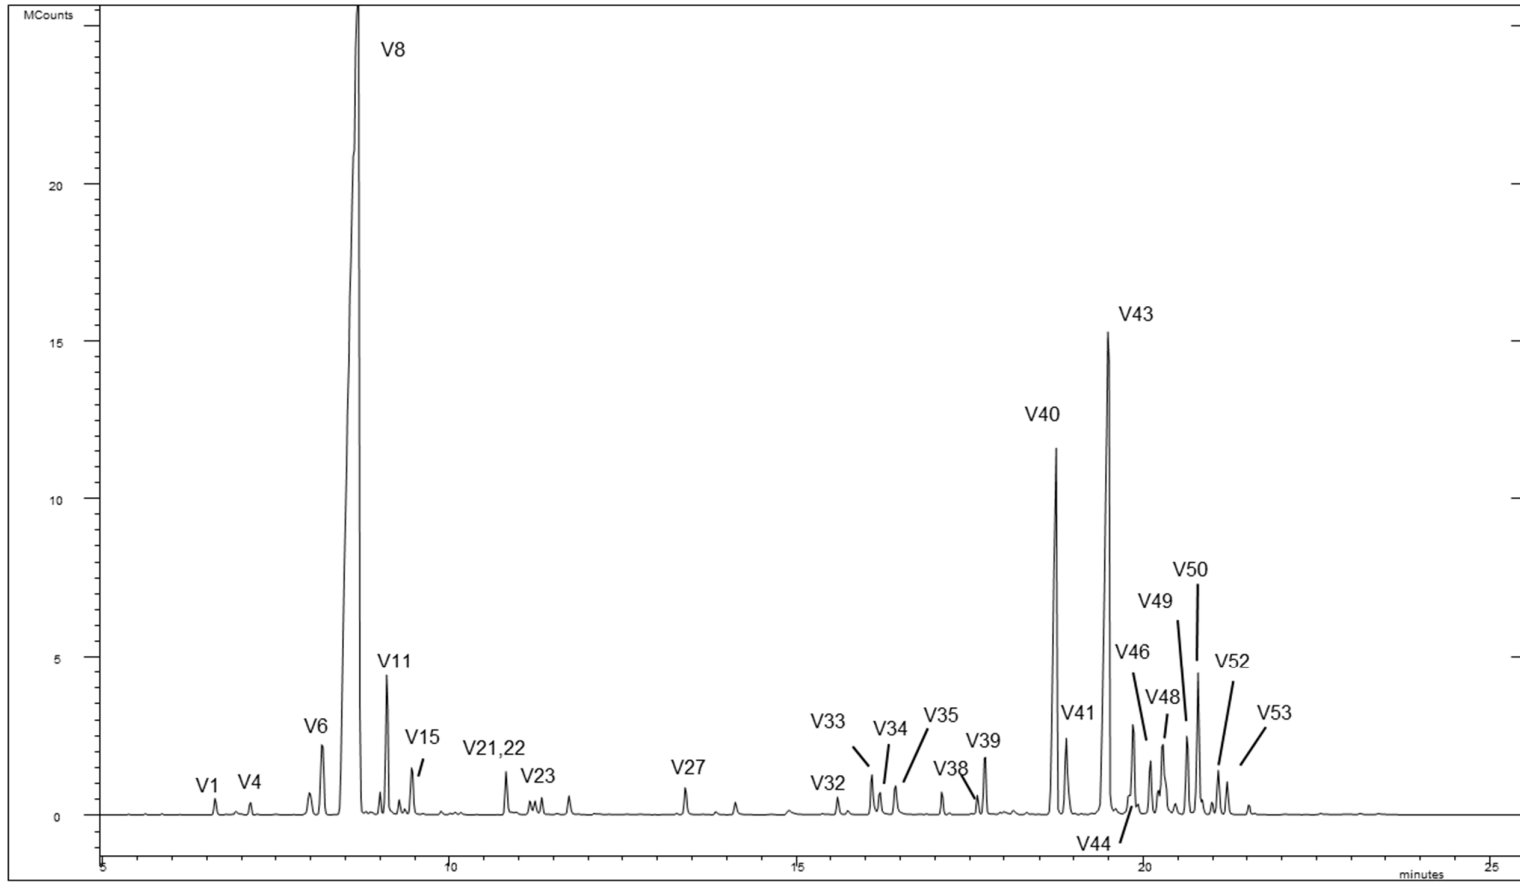

Supplement: foods-09-00541-s001.pdf [file foods-09-00541-s001.pdf]
